# Supplementary material
Source: ML conference proceedings conference paper supplement (https://proceedings.neurips.cc/paper_files/paper/2019/hash/f9beb1e831faf6aaec2a5cecaf1af293-Abstract.html)
Supplement: Supplementary file [file f9beb1e831faf6aaec2a5cecaf1af293-Supplemental.zip]

## 7 Supplementary Material

### 7.1 Proof of Proposition 2

*Proof.* The proof is a simpler, two-step variation of that of [5], which we refer to for additional details. For all  $\varepsilon \geq 0$ , let  $\pi_\varepsilon$  be the optimal plan for  $d_{\mathbf{P}_\varepsilon}^2$ , and suppose there exists  $\pi$  such that  $\pi_\varepsilon \rightarrow \pi$  (which is possible up to subsequences). By definition of  $\pi_\varepsilon$ , we have that

$$\forall \varepsilon \geq 0, \int d_{\mathbf{P}_\varepsilon}^2 d\pi_\varepsilon \leq \int d_{\mathbf{P}_\varepsilon}^2 d\pi_{\text{MK}}.$$

Since  $d_{\mathbf{P}_\varepsilon}^2$  converges locally uniformly to  $d_{\mathbf{V}_E}^2 \stackrel{\text{def}}{=} (x, y) \rightarrow (x - y)^\top \mathbf{V}_E \mathbf{V}_E^\top (x - y)$ , we get  $\int d_{\mathbf{V}_E}^2 d\pi \leq \int d_{\mathbf{V}_E}^2 d\pi_{\text{MK}}$ . But by definition of  $\pi_{\text{MK}}$ ,  $(\pi_{\text{MK}})_E \stackrel{\text{def}}{=} (p_E, p_E)_\# \pi_{\text{MK}}$  is the optimal transport plan on  $E$ , therefore the last inequality implies  $\pi_E = (\pi_{\text{MK}})_E$ .

Next, notice that the  $\pi_\varepsilon$ 's all have the same marginals  $\mu_E, \nu_E$  on  $E$  and hence cannot perform better on  $E$  than  $\pi_{\text{MK}}$ . Therefore,

$$\begin{aligned} \int_{E \times E} d_{\mathbf{V}_E}^2 d(\pi_{\text{MK}}) + \varepsilon \int d_{\mathbf{V}_{E^\perp}}^2 d\pi_\varepsilon &\leq \int d_{\mathbf{P}_\varepsilon}^2 d\pi_\varepsilon \\ &\leq \int d_{\mathbf{P}_\varepsilon}^2 d\pi_{\text{MK}} \\ &= \int_{E \times E} d_{\mathbf{V}_E}^2 d(\pi_{\text{MK}})_E + \varepsilon \int d_{\mathbf{V}_{E^\perp}}^2 d\pi_{\text{MK}}. \end{aligned}$$

Hence, passing to the limit,  $\int d_{\mathbf{V}_{E^\perp}}^2 d\pi \leq \int d_{\mathbf{V}_{E^\perp}}^2 d\pi_{\text{MK}}$ . Let us now disintegrate this inequality on  $E \times E$  (using the equality  $\pi_E = (\pi_{\text{MK}})_E$ ):

$$\int \int_{E^\perp \times E^\perp} d_{\mathbf{V}_{E^\perp}}^2 d\pi_{(x_E, y_E)} d(\pi_{\text{MK}})_E \leq \int \int_{E^\perp \times E^\perp} d_{\mathbf{V}_{E^\perp}}^2 d(\pi_{\text{MK}})_{(x_E, y_E)} d(\pi_{\text{MK}})_E.$$

Again, by definition, for  $(x_E, y_E)$  in the support of  $(\pi_{\text{MK}})_E$ ,  $(\pi_{\text{MK}})_{(x_E, y_E)}$  is the optimal transportation plan between  $\mu_{x_E}$  and  $\nu_{y_E}$ , and the previous inequality implies  $\pi_{(x_E, y_E)} = (\pi_{\text{MK}})_{(x_E, y_E)}$  for  $(\pi_{\text{MK}})_E$ -a.e.  $(x_E, y_E)$ , and finally  $\pi = \pi_{\text{MK}}$ . Finally, by the a.c. hypothesis, all transport plans  $\pi_\varepsilon$  come from transport maps  $T_\varepsilon$ , which implies  $T_\varepsilon \rightarrow T_{\text{MK}}$  in  $L_2(\mu)$ . ■

### 7.2 Proof of Proposition 3

*Proof.* Let  $\mathbf{X} \subset \mathbb{R}^d$  be a compact,  $\mu, \nu \in \mathcal{P}(\mathbf{X})$  be two a.c. measures,  $E$  a  $k$ -dimensional subspace which we identify w.l.o.g. with  $\mathbb{R}^k$  and  $\pi_{\text{MI}} \in \mathcal{P}(\mathbb{R}^d \times \mathbb{R}^d)$  as in Definition 2. For  $n \in \mathbb{N}$ , let  $\mu_n = \frac{1}{n} \sum_{i=1}^n \delta_{x_i}$ ,  $\nu_n = \frac{1}{n} \sum_{i=1}^n \delta_{y_i}$  where the  $x_i$  (resp.  $y_i$ ) are i.i.d. samples from  $\mu$  (resp.  $\nu$ ). Let  $t_n : \mathbb{R}^k \rightarrow \mathbb{R}^k$  be the Monge map from the projection on  $E$   $(p_E)_\# \mu_n$  of  $\mu_n$  to that of  $\nu_n$ , and  $\pi_n \stackrel{\text{def}}{=} (\text{Id}, t_n)_\# [(p_E)_\# \mu_n]$ .

Up to points having the same projections on  $E$  (which under the a.c. assumption is a 0 probability event),  $t_n$  can be extended to a transport between  $\mu_n$  and  $\nu_n$ , whose transport plan we will denote  $\gamma_n$ .

Let  $f \in C_b(\mathbf{X} \times \mathbf{X})$ . Since we are on a compact, by density (given by the Stone-Weierstrass theorem) it is sufficient to consider functions of the form

$$f(x_1, \dots, x_d; y_1, \dots, y_d) = g(x_1, \dots, x_k; y_1, \dots, y_k) h(x_{k+1}, \dots, x_d; y_{k+1}, \dots, y_d).$$

We will use this along with the disintegrations of  $\gamma_n$  on  $E \times E$  (denoted  $(\gamma_n)_{x_{1:k}, y_{1:k}}, (x_{1:k}, y_{1:k}) \in E \times E$ ) to prove convergence:

$$\begin{aligned} \int_{\mathbf{X} \times \mathbf{X}} f d\gamma_n &= \int_{\mathbf{X} \times \mathbf{X}} g(x_{1:k}, y_{1:k}) h(x_{k+1:d}, y_{k+1:d}) d\gamma_n \\ &= \int_{E \times E} g(x_{1:k}, y_{1:k}) d\pi_n \int h(x_{k+1:d}, y_{k+1:d}) d(\gamma_n)_{x_{1:k}, y_{1:k}} \\ &= \int_{E \times E} g(x_{1:k}, y_{1:k}) d\pi_n \int h(x_{k+1:d}, y_{k+1:d}) d(\mu_n)_{x_{1:k}} d(\nu_n)_{t_n(x_{1:k})}. \end{aligned}$$

Then, we use (i) the Arzela-Ascoli theorem to get uniform convergence of  $t_n$  to  $T_E$  to get  $d(\nu_n)_{t_n(x_{1:k})} \rightarrow d(\nu)_{T_E(x_{1:k})}$  and (ii) the convergence  $\pi_n \rightarrow (p_E, p_E)_\#(\pi_{\text{MI}})$  to get

$$\begin{aligned} & \int_{E \times E} g(x_{1:k}, y_{1:k}) d\pi_n \int h(x_{k+1:d}, y_{k+1:d}) d(\mu_n)_{x_{1:k}} d(\nu_n)_{t_n(x_{1:k})} \\ & \rightarrow \int_{E \times E} g(x_{1:k}, y_{1:k}) d(p_E, p_E)_\#(\pi_{\text{MI}}) \int h(x_{k+1:d}, y_{k+1:d}) d(\mu)_{x_{1:k}} d(\nu)_{T_E(x_{1:k})} \\ & = \int_{\mathbf{X} \times \mathbf{X}} f d\pi_{\text{MI}}, \end{aligned}$$

which concludes the proof in the compact case. ■

### 7.3 Proof of Proposition 4

*Proof.* Let  $\mathbf{T}_E : \mathbf{A}_E^{-\frac{1}{2}} (\mathbf{A}_E^{\frac{1}{2}} \mathbf{B}_E \mathbf{A}_E^{\frac{1}{2}})^{\frac{1}{2}} \mathbf{A}_E^{-\frac{1}{2}}$  be the Monge map from  $\mu_E \stackrel{\text{def}}{=} (p_E)_\# \mu$  and  $\nu_E \stackrel{\text{def}}{=} (p_E)_\# \nu$ . Let

$$V = \begin{pmatrix} | & & | & | & & | \\ v_1 & \dots & v_k & v_{k+1} & \dots & v_d \\ | & & | & | & & | \end{pmatrix} = (\mathbf{V}_E \quad \mathbf{V}_{E^\perp}) \in \mathbb{R}^{d \times d},$$

where  $(v_1 \dots v_k)$  is an orthonormal basis of  $E$  and  $(v_{k+1} \dots v_d)$  an orthonormal basis of  $E^\perp$ . Let us denote  $X_E \stackrel{\text{def}}{=} p_E(X) \in \mathbb{R}^k$  and *mutatis mutandis* for  $Y, E^\perp$ . Denote  $\mathbf{A}_E = p_E \mathbf{A} p_E^\top$ ,  $\mathbf{A}_{E^\perp} = p_{E^\perp} \mathbf{A} p_{E^\perp}^\top$ ,  $\mathbf{A}_{EE^\perp} = p_E \mathbf{A} p_{E^\perp}^\top$ . With these notations, we decompose the derivation of  $\mathbb{E}[XY^\top]$  along  $E$  and  $E^\perp$ :

$$\begin{aligned} \mathbb{E}[XY^\top] &= \mathbb{E}[\mathbf{V}_E X_E (\mathbf{V}_E Y_E)^\top] + \mathbb{E}[\mathbf{V}_{E^\perp} X_{E^\perp} (\mathbf{V}_{E^\perp} Y_{E^\perp})^\top] \\ &\quad + \mathbb{E}[\mathbf{V}_{E^\perp} X_{E^\perp} (\mathbf{V}_E Y_E)^\top] \\ &\quad + \mathbb{E}[\mathbf{V}_E X_E (\mathbf{V}_{E^\perp} Y_{E^\perp})^\top]. \end{aligned}$$

We can condition all four terms on  $X_E$ , and use point independence given coordinates on  $E$  which implies  $(Y_E | X_E) = X_E$ . The constraint  $Y_E = \mathbf{T}_E X_E$  allows us to derive  $\mathbb{E}[Y_{E^\perp} | X_E]$ : indeed, it holds that

$$\begin{pmatrix} Y_E \\ Y_{E^\perp} \end{pmatrix} \sim \mathcal{N} \left( 0_d, \begin{pmatrix} \mathbf{B}_E & \mathbf{B}_{EE^\perp} \\ \mathbf{B}_{EE^\perp}^\top & \mathbf{B}_{E^\perp} \end{pmatrix} \right),$$

which, using standard Gaussian conditioning properties, implies that

$$\mathbb{E}[Y_{E^\perp} | Y_E = \mathbf{T}_E X_E] = \mathbf{B}_{EE^\perp}^\top \mathbf{B}_E^{-1} \mathbf{T}_E X_E,$$

and therefore

$$\mathbb{E}[Y_{E^\perp} | \mathbf{P}_E(Y) = \mathbf{T}_E X_E] = \mathbf{V}_{E^\perp} \mathbf{B}_{EE^\perp}^\top \mathbf{B}_E^{-1} \mathbf{V}_E^\top \mathbf{T}_E X_E.$$

Likewise,

$$\mathbb{E}[X_{E^\perp} | \mathbf{P}_E(X)] = \mathbf{V}_{E^\perp} \mathbf{A}_{EE^\perp}^\top \mathbf{A}_E^{-1} \mathbf{V}_E^\top X_E.$$

We now have all the ingredients necessary to the derivation of the four terms of  $\mathbb{E}[XY^\top]$ :

$$\begin{aligned}
\mathbb{E}[\mathbf{V}_E X_E Y_E^\top \mathbf{V}_E^\top] &= \mathbf{V}_E \mathbb{E}_{X_E} [\mathbb{E}[X_E Y_E^\top | X_E]] \mathbf{V}_E^\top \\
&= \mathbf{V}_E \mathbb{E}_{X_E} [X_E \mathbb{E}[Y_E^\top | X_E]] \mathbf{V}_E^\top \\
&= \mathbf{V}_E \mathbb{E}_{X_E} [X_E X_E^\top \mathbf{T}_E^\top] \mathbf{V}_E^\top \\
&= \mathbf{V}_E \mathbb{E}_{X_E} [X_E X_E^\top] \mathbf{T}_E^\top \mathbf{V}_E^\top \\
&= \mathbf{V}_E \mathbf{A}_E \mathbf{T}_E \mathbf{V}_E^\top
\end{aligned}$$

$$\begin{aligned}
\mathbb{E}[\mathbf{V}_E X_E Y_{E^\perp}^\top \mathbf{V}_{E^\perp}^\top] &= \mathbf{V}_E \mathbb{E}_{X_E} [\mathbb{E}[X_E Y_{E^\perp}^\top | X_E]] \mathbf{V}_{E^\perp}^\top \\
&= \mathbf{V}_E \mathbb{E}_{X_E} [X_E \mathbb{E}[Y_{E^\perp}^\top | X_E = \mathbf{T}_E X_E]] \mathbf{V}_{E^\perp}^\top \\
&= \mathbf{V}_E \mathbb{E}_{X_E} [X_E (V_{E^\perp} \mathbf{B}_{EE^\perp}^\top \mathbf{B}_E^{-1} \mathbf{V}_E^\top \mathbf{T}_E X_E)^\top] \mathbf{V}_{E^\perp}^\top \\
&= \mathbf{V}_E \mathbb{E}_{X_E} [X_E X_E^\top] \mathbf{T}_E^\top \mathbf{V}_E \mathbf{B}_{V_E}^{-\top} \mathbf{B}_{V_{E^\perp}} \mathbf{V}_{E^\perp}^\top \\
&= \mathbf{V}_E \mathbf{A}_E \mathbf{T}_E \mathbf{V}_E \mathbf{B}_E^{-1} \mathbf{B}_{V_{E^\perp}} \mathbf{V}_{E^\perp}^\top \\
&= \mathbf{V}_E \mathbf{A}_E \mathbf{T}_E \mathbf{V}_E \mathbf{B}_E^{-1} \mathbf{V}_E^\top \mathbf{B}_{EE^\perp} \mathbf{V}_{E^\perp}^\top
\end{aligned}$$

$$\begin{aligned}
\mathbb{E}[\mathbf{V}_{E^\perp} X_{E^\perp} Y_E^\top \mathbf{V}_E^\top] &= \mathbf{V}_{E^\perp} \mathbb{E}_{X_E} [\mathbb{E}[X_{E^\perp} Y_E^\top | X_E]] \mathbf{V}_E^\top \\
&= \mathbf{V}_{E^\perp} \mathbb{E}_{X_E} [\mathbb{E}[X_{E^\perp} | X_E] X_E^\top \mathbf{T}_E^\top] \mathbf{V}_E^\top \\
&= \mathbf{V}_{E^\perp} \mathbb{E}_{X_E} [\mathbf{A}_{EE^\perp}^\top \mathbf{A}_E^{-1} X_E X_E^\top \mathbf{T}_E^\top] \mathbf{V}_E^\top \\
&= \mathbf{V}_{E^\perp} \mathbf{V}_{E^\perp} \mathbf{A}_{EE^\perp}^\top \mathbf{A}_E^{-1} \mathbf{V}_E^\top \mathbf{A}_E \mathbf{T}_E \mathbf{V}_E^\top \\
&= \mathbf{V}_{E^\perp} \mathbf{V}_{E^\perp} \mathbf{A}_{EE^\perp}^\top \mathbf{T}_E \mathbf{V}_E^\top \\
&= \mathbf{V}_{E^\perp} \mathbf{A}_{EE^\perp}^\top \mathbf{T}_E \mathbf{V}_E^\top
\end{aligned}$$

$$\begin{aligned}
\mathbb{E}[\mathbf{V}_{E^\perp} X_{E^\perp} Y_{E^\perp}^\top \mathbf{V}_{E^\perp}^\top] &= V_{E^\perp} \mathbb{E}_{X_E} [\mathbb{E}[X_{E^\perp} | X_E] \mathbb{E}[Y_{E^\perp}^\top | X_E]] \mathbf{V}_{E^\perp}^\top \\
&= \mathbf{V}_{E^\perp} \mathbb{E}_{X_E} [\mathbf{V}_{E^\perp} \mathbf{A}_{EE^\perp}^\top \mathbf{A}_E^{-1} \mathbf{V}_E^\top X_E X_E^\top \mathbf{T}_E^\top \mathbf{V}_E \mathbf{B}_{V_E}^{-\top} \mathbf{B}_{V_{E^\perp}}] \mathbf{V}_{E^\perp}^\top \\
&= \mathbf{V}_{E^\perp} \mathbf{A}_{EE^\perp}^\top \mathbf{A}_E^{-1} \mathbf{V}_E^\top \mathbf{A}_E \mathbf{T}_E \mathbf{V}_E \mathbf{B}_E^{-1} \mathbf{B}_{EE^\perp} \mathbf{V}_{E^\perp}^\top \\
&= \mathbf{V}_{E^\perp} \mathbf{A}_{EE^\perp}^\top \mathbf{T}_E \mathbf{B}_E^{-1} \mathbf{B}_{EE^\perp} \mathbf{V}_{E^\perp}^\top \\
&= V_{E^\perp} \mathbf{A}_{EE^\perp}^\top \mathbf{T}_E \mathbf{V}_E \mathbf{B}_{V_E}^{-1} \mathbf{V}_E^\top \mathbf{B}_{EE^\perp},
\end{aligned}$$

Let  $\gamma \stackrel{\text{def}}{=} \mathcal{N}(0_{2d}, \Sigma_{\pi_E})$ .  $\gamma$ , is well defined, since  $\Sigma_{\pi_E}$  is the covariance matrix of  $\pi_E$  and is thus PSD. From then,  $\gamma$  clearly has marginals  $\mathcal{N}(0_d, \mathbf{A})$  and  $\mathcal{N}(0_d, \mathbf{B})$ , and is such that  $(p_E, p_E)_\# \gamma$  is a centered Gaussian distribution with covariance matrix

$$\begin{pmatrix} p_E & 0_{d \times d} \\ 0_{d \times d} & p_E \end{pmatrix} \begin{pmatrix} \mathbf{A} & \mathbb{E}_\pi[XY^\top] \\ \mathbb{E}_\pi[YX^\top] & \mathbf{B} \end{pmatrix} \begin{pmatrix} p_E & 0_{d \times d} \\ 0_{d \times d} & p_E \end{pmatrix} = \begin{pmatrix} \mathbf{A}_E & \mathbf{A}_E \mathbf{T}_E \\ \mathbf{T}_E \mathbf{A}_E & \mathbf{B}_E \end{pmatrix},$$

where we use that  $p_E p_E = p_E$  and  $p_E p_{E^\perp} = 0$ . From the  $k = d$  case, we recognise the covariance matrix of the optimal transport between centered Gaussians with covariance matrices  $\mathbf{A}_E$  and  $\mathbf{B}_E$ , which proves that the marginal of  $\gamma$  over  $E \times E$  is the optimal transport between  $\mu_E$  and  $\nu_E$ .

To complete the proof, there remains to show that the disintegration of  $\gamma$  on  $E \times E$  is the product law. Denote

$$\begin{aligned}
\mathbf{C} &\stackrel{\text{def}}{=} \mathbb{E}[XY^\top] \\
&= \mathbf{V}_E \mathbf{A}_E \mathbf{T}_E (\mathbf{V}_E^\top + (\mathbf{B}_E)^{-1} \mathbf{V}_E^\top \mathbf{B}_{EE^\perp}) + \mathbf{V}_{E^\perp} \mathbf{A}_{E^\perp} \mathbf{T}_{V_E} (\mathbf{V}_E^\top + (\mathbf{B}_{V_E})^{-1} \mathbf{V}_E^\top \mathbf{B}_{EE^\perp}) \\
&= (\mathbf{V}_E \mathbf{A}_E + \mathbf{V}_{E^\perp} \mathbf{A}_{E^\perp}) \mathbf{T}_E (\mathbf{V}_E^\top + (\mathbf{B}_E)^{-1} \mathbf{B}_{EE^\perp} \mathbf{V}_{E^\perp}^\top),
\end{aligned}$$

and let  $\Sigma_{\pi_{\mathbf{M}}} = \begin{pmatrix} \mathbf{A} & \mathbb{E}[XY^\top] \\ \mathbb{E}[YX^\top] & \mathbf{B} \end{pmatrix}$  as in Prop. 4. It holds that

$$\begin{aligned} \mathbf{C}_E &\stackrel{\text{def}}{=} \mathbf{V}_E^\top \mathbf{C} \mathbf{V}_E = \mathbf{A}_E \mathbf{T}_E \\ \mathbf{C}_{E^\perp} &\stackrel{\text{def}}{=} \mathbf{V}_{E^\perp}^\top \mathbf{C} \mathbf{V}_E = \mathbf{A}_{E^\perp E} \mathbf{T}_E (\mathbf{B}_E)^{-1} \mathbf{B}_{EE^\perp} \\ \mathbf{C}_{EE^\perp} &\stackrel{\text{def}}{=} \mathbf{V}_E^\top \mathbf{C} \mathbf{V}_{E^\perp} = \mathbf{A}_E \mathbf{T}_E (\mathbf{B}_E)^{-1} \mathbf{B}_{EE^\perp} \\ \mathbf{C}_{E^\perp E} &\stackrel{\text{def}}{=} \mathbf{V}_{E^\perp}^\top \mathbf{C} \mathbf{V}_E = \mathbf{A}_{E^\perp E} \mathbf{T}_E. \end{aligned}$$

Therefore, if  $(X, Y) \sim \gamma$ , then

$$\text{Cov} \begin{pmatrix} X_{E^\perp} \\ Y_{E^\perp} \\ X_E \\ Y_E \end{pmatrix} = \begin{pmatrix} \mathbf{A}_{E^\perp} & \mathbf{C}_{E^\perp} & \mathbf{A}_{E^\perp E} & \mathbf{C}_{E^\perp E} \\ \mathbf{C}_{E^\perp}^\top & \mathbf{B}_{E^\perp} & \mathbf{C}_{EE^\perp}^\top & \mathbf{B}_{E^\perp E} \\ \mathbf{A}_{EE^\perp} & \mathbf{C}_{EE^\perp} & \mathbf{A}_E & \mathbf{C}_E \\ \mathbf{C}_{EE^\perp}^\top & \mathbf{B}_{EE^\perp} & \mathbf{C}_E & \mathbf{B}_E \end{pmatrix},$$

and therefore

$$\text{Cov} \begin{pmatrix} X_{E^\perp} & | & X_E \\ Y_{E^\perp} & | & Y_E \end{pmatrix} = \begin{pmatrix} \mathbf{A}_{E^\perp} & \mathbf{C}_{E^\perp} \\ \mathbf{C}_{E^\perp}^\top & \mathbf{B}_{E^\perp} \end{pmatrix} - \begin{pmatrix} \mathbf{A}_{E^\perp E} & \mathbf{C}_{E^\perp E} \\ \mathbf{C}_{EE^\perp}^\top & \mathbf{B}_{E^\perp E} \end{pmatrix} \begin{pmatrix} \mathbf{A}_E & \mathbf{C}_E \\ \mathbf{C}_E^\top & \mathbf{B}_E \end{pmatrix}^\dagger \begin{pmatrix} \mathbf{A}_{EE^\perp} & \mathbf{C}_{EE^\perp} \\ \mathbf{C}_{EE^\perp}^\top & \mathbf{B}_{EE^\perp} \end{pmatrix},$$

where  $\mathbf{M}^\dagger$  denotes the Moore-Penrose pseudo-inverse of  $\mathbf{M}$ . In the present case, one can check that

$$\begin{pmatrix} \mathbf{A}_E & \mathbf{C}_E \\ \mathbf{C}_E^\top & \mathbf{B}_E \end{pmatrix}^\dagger = \frac{1}{4} \begin{pmatrix} \mathbf{A}_E^{-1} & \mathbf{A}_E^{-1} \mathbf{T}_E^{-1} \\ \mathbf{T}_E^{-1} \mathbf{A}_E^{-1} & \mathbf{B}_E^{-1} \end{pmatrix},$$

which gives, after simplification

$$\begin{pmatrix} \mathbf{A}_{E^\perp E} & \mathbf{C}_{E^\perp E} \\ \mathbf{C}_{EE^\perp}^\top & \mathbf{B}_{E^\perp E} \end{pmatrix} \begin{pmatrix} \mathbf{A}_E & \mathbf{C}_E \\ \mathbf{C}_E^\top & \mathbf{B}_E \end{pmatrix}^\dagger \begin{pmatrix} \mathbf{A}_{EE^\perp} & \mathbf{C}_{EE^\perp} \\ \mathbf{C}_{EE^\perp}^\top & \mathbf{B}_{EE^\perp} \end{pmatrix} = \begin{pmatrix} \mathbf{A}_{E^\perp E} \mathbf{A}_E^{-1} \mathbf{A}_{EE^\perp} & \mathbf{C}_{E^\perp} \\ \mathbf{C}_{E^\perp}^\top & \mathbf{B}_{E^\perp E} \mathbf{B}_E^{-1} \mathbf{B}_{EE^\perp} \end{pmatrix},$$

and thus

$$\begin{aligned} \text{Cov} \begin{pmatrix} X_{E^\perp} & | & X_E \\ Y_{E^\perp} & | & Y_E \end{pmatrix} &= \begin{pmatrix} \mathbf{A}_{E^\perp} - \mathbf{A}_{E^\perp E} (\mathbf{A}_E)^{-1} \mathbf{A}_{EE^\perp} & 0_d \\ 0_d & \mathbf{B}_{E^\perp} - \mathbf{B}_{E^\perp E} (\mathbf{B}_E)^{-1} \mathbf{B}_{EE^\perp} \end{pmatrix} \\ &= \begin{pmatrix} \text{Cov}(X_{E^\perp} | X_E) & 0_d \\ 0_d & \text{Cov}(Y_{E^\perp} | Y_E) \end{pmatrix}, \end{aligned}$$

that is, the conditional laws of  $X_{E^\perp}$  given  $X_E$  and  $Y_{E^\perp}$  given  $Y_E$  are independent under  $\gamma$ .

■
